# Supplementary material
Source: publisher figshare collection journal article supplement (https://tandf.figshare.com/ndownloader/files/17458049)
Supplement: Supplementary file 1 [file 17458049]

Supplementary Table 1. Respondents’ demographics.

| Characteristics | Parameters | Frequency (%) |
| --- | --- | --- |
| Gender | males  females | 37 (41.0)  54 (59.0) |
| Post medical qualification practice (years) | <5  6-10  11-15  16-20  >20 | –  27 (29.6)  40 (44.0)  4 (4.4)  20 (22.0) |
| Additional qualifications | yes | 67 (73.6) |
| Doctors’ speciality | Hematology (internal medicine)  Hematology (pathology)  Pediatrics  Internal medicine  Family medicine/general  Medical practitioner trainee (residents) | 13  19  25  10  17  7 |
| Years of practice in doctors’ speciality | <5  6-10  11-15  16-20  >20 | 24  50  7  3  7 |
| Attend sickle cell disease patients | yes | 91 (100.0) |
| Dedicated Sickle Cell Disease Clinic | yes | 61 (67.03) |
| Category of patients with sickle cell disease | pediatric  adult  both | 27 (29.67)  29 (31.86)  35 (38.46) |
| Type of hospital facility | Teaching Hospital/Tertiary Health Center  General Hospital  Health Center  Private Hospital/Clinic | 61 (67.03)  25 (27.47)  3 (3.3)  2 (2.2) |
| Years of experience with sickle cell disease patients | <5  6-10  11-15  16-20  >20 | 18 (19.78)  32 (35.16)  23 (25.27)  7 (7.69)  11 (12.08) |

Supplementary Table 2. Hydroxyurea and routine drug prescriptions and laboratory facilities.

|  | Parameters | *n* (%) |
| --- | --- | --- |
| Number of patients currently being managed | <10  10-50  >50 | 13 (14.81)  51 (55.56)  27 (29.63) |
| Out-patient HU RX per month | none  <5  6-10  >10 | 10 (11.00)  61 (66.70)  20 (22.20)  – |
| Facilities to monitor patients on HU | HPLC for Hb F level  electronic cell counter  liver function tests  renal function tests | 20 (22.22)  88 (96.70)  88 (96.70)  88 (96.70) |
| Routine RX for the management of sickle cell disease | Folic acid  Paludrine (Progaunil HCl)  Vitamin C  B-Complex  Multivitamins  Omega 3 fatty acid  Penicillin/Erythromycin | 91 (100.00)  88 (96.70)  51 (55.56)  44 (48.15)  31 (33.33)  13 (14.81)  7 (7.41) |

HU: hydroxyurea; HPLC: high performance liquid chromatography.
